# Supplementary material for: Matrix metalloproteinase responsive hydrogel microplates for programmed killing of invasive tumour cells
Source: Royal Society of Chemistry journal article supplement (doi:10.1039/d3lp00057e), 2023-01-01
Supplement: d3lp00057e1.pdf [file d3lp00057e1.pdf]

## Supporting Information

### Matrix metalloproteinase responsive hydrogel microplates for programmed killing of invasive tumour cells

Alexander B. Cook<sup>\*a+</sup>, Annalisa Palange<sup>a</sup>, Michele Schlich<sup>a</sup>, Elena Bellotti<sup>a</sup>, Sayanti Brahmachari<sup>a</sup>,  
Martina di Francesco<sup>a</sup>, Paolo Decuzzi<sup>a</sup>

<sup>a</sup> Laboratory of Nanotechnology for Precision Medicine

Istituto Italiano di Tecnologia

Via Morego, 16163 Genova, Italy

<sup>+</sup> Present address: Bio-organic chemistry group,

Department of Chemical Engineering and Chemistry, 5600 MB Eindhoven, Netherlands

\*Corresponding author: Alexander B Cook; [a.b.cook@tue.nl](mailto:a.b.cook@tue.nl)

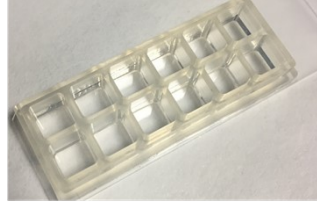

Template: 1cm x 1cm x 0.5cm

**Figure S1.** Macroscale hydrogel template utilized in this study.

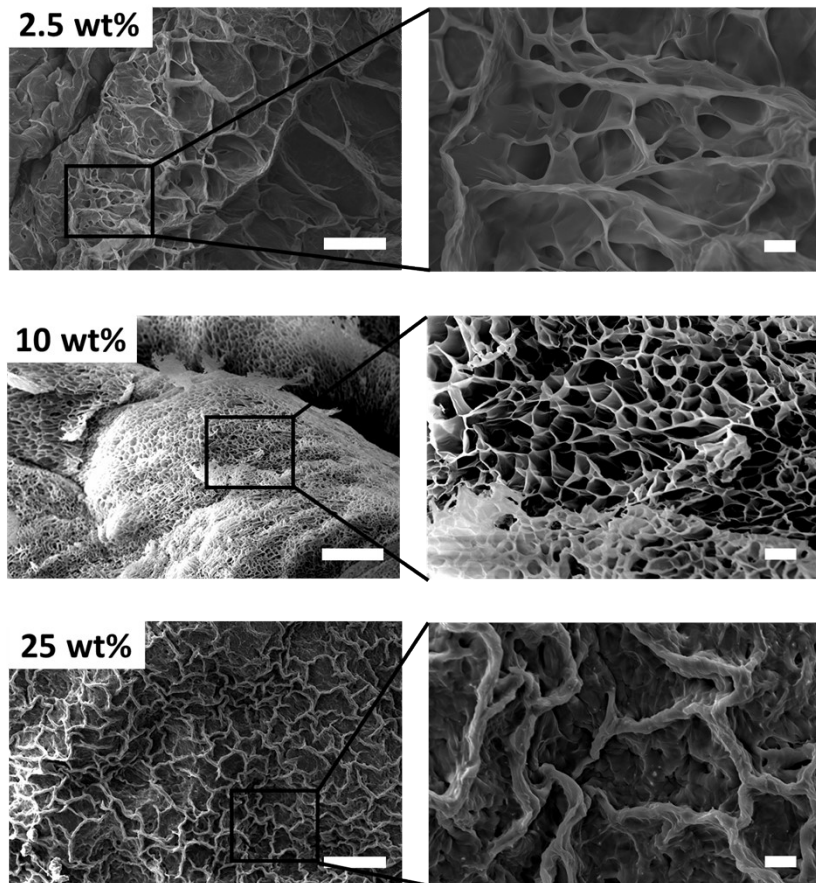

**Figure S2.** SEM images of lyophilized macroscopic hydrogels from different gel precursor initial concentrations (scale bars left panels: 100  $\mu\text{m}$ , scale bars right panels: 10  $\mu\text{m}$ ).

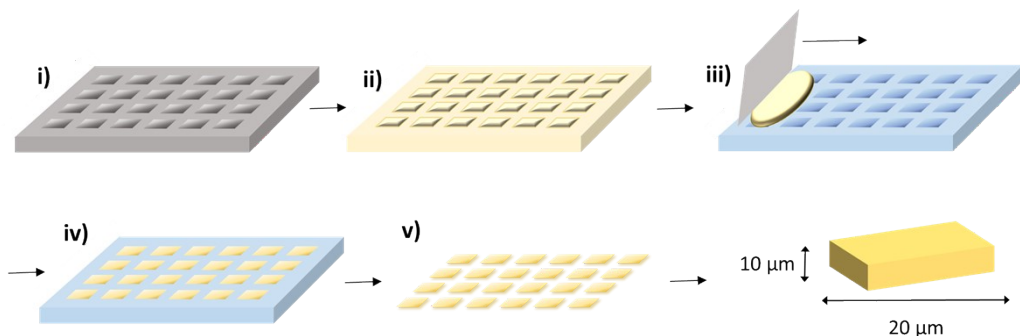

**Figure S3.** Fabrication and characterization of hydrogel microplates using soft-lithography method, **i)** Silicon master template with electron beam etched features, **ii)** PDMS inverse template, **iii)** Sacrificial PVA replica template, **iv)** PVA template filled with hydrogel precursor solution and crosslinked with 365 nm UV light, **v)** dissolution of PVA template in water and purification of hydrogel microplates

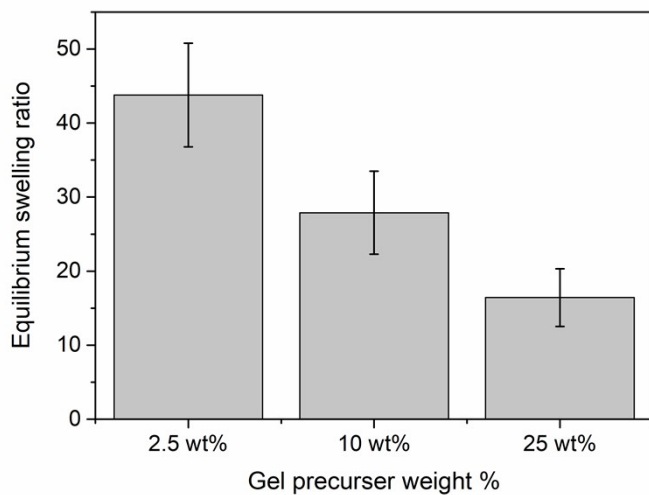

**Figure S4.** Equilibrium swelling ratios (mass) of macroscopic polyethylene glycol peptide thiol-ene hydrogels of varying stiffness (error bar represents S.D. of three measurements).

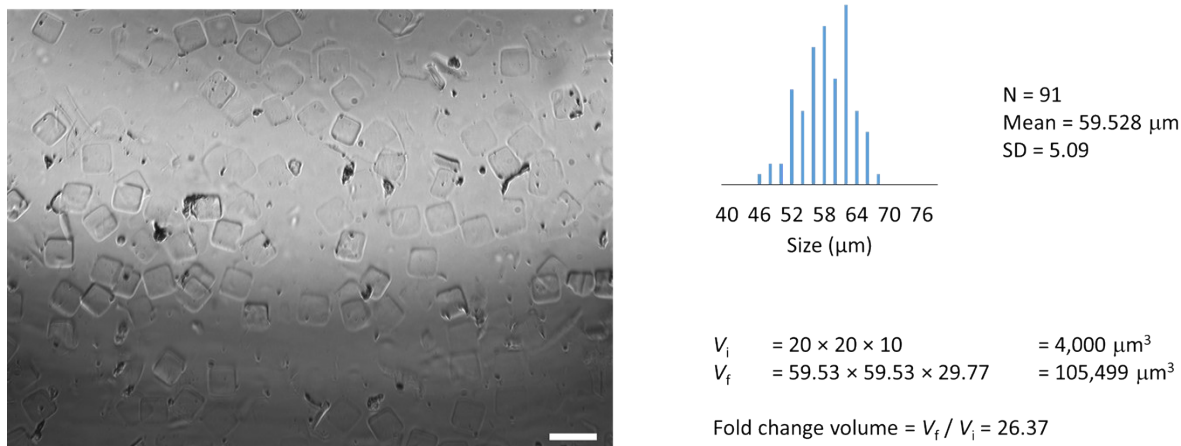

**Figure S5.** Size distribution of microplates in solution from optical microscopy, and associated 10 wt% microgel swelling characterization, in comparison to PVA template idealized particle sizes ( $20 \times 20 \times 10 \mu\text{m}$ ). Scale bar:  $100 \mu\text{m}$ .

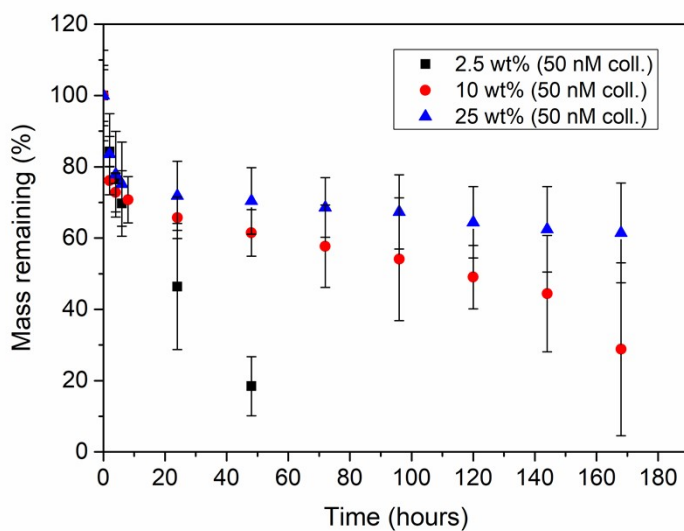

**Figure S6.** Macroscale hydrogel mass degradation (varying stiffness from different hydrogel precursor initial concentrations) in 50 nM solutions of MMP-2/9 (collagenase IV) at  $37 \text{ }^\circ\text{C}$  over time.

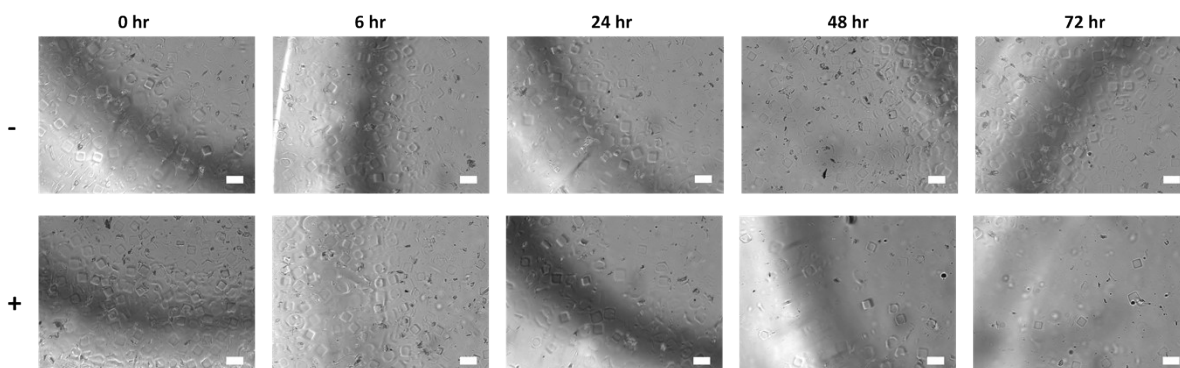

**Figure S7.** Optical microscopy images of hydrogel microplates and their degradation in either presence (bottom '+ line') or absence (top '- line') of 50 nM concentrations of MMP-2/9 (collagenase IV) at 37 °C over time (scale bars: 100  $\mu$ m).

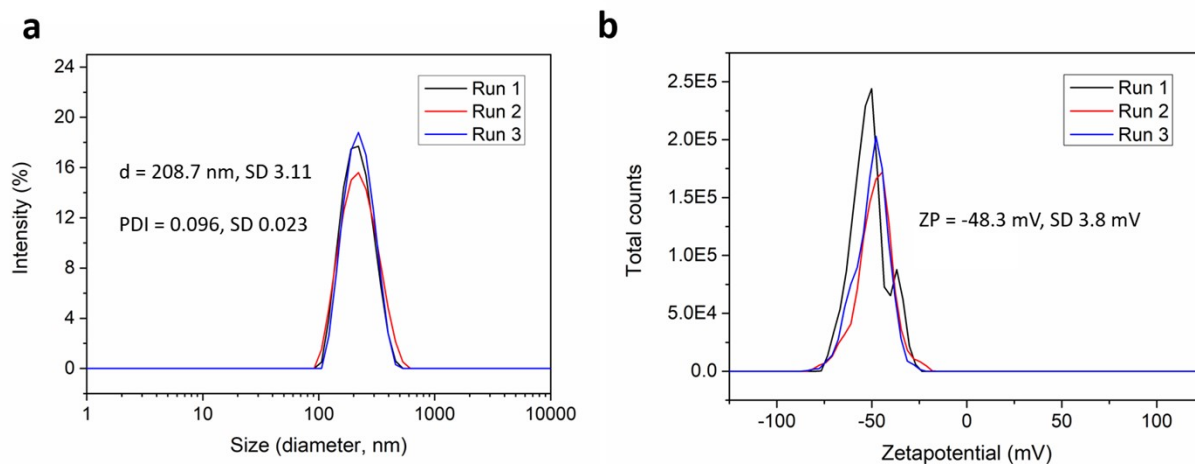

**Figure S8.** **a)** DLS size distribution of DTXL containing PLGA SPNs in water, **b)** Zeta potential distribution of DTXL containing PLGA SPNs in water.
